# Supplementary material for: Spatial decoupling strategy boosted alkaline hydrogen evolution for an efficient solar-driven AEM electrolyzer
Source: Royal Society of Chemistry journal article supplement (doi:10.1039/d4ta03872j), 2024-01-01
Supplement: d4ta03872j2.pdf [file d4ta03872j2.pdf]

## Supporting Information

### **Spatial decoupling strategy boosted alkaline hydrogen evolution for efficient solar-driven AEM electrolyzer**

*Minghui Cui<sup>a</sup>, Yansong Zhou<sup>a</sup>, Rongjing Guo<sup>b</sup>, Wenqi Zhao<sup>a</sup>, Yanjing Liu<sup>a</sup>,  
Qiongrong Ou<sup>a,\*</sup>, Shuyu Zhang<sup>a,\*</sup>*

<sup>a</sup> State Key Laboratory of Photovoltaic Science and Technology, Institute for Electric Light Sources, School of Information Science and Technology, Fudan University, Shanghai, 200433, China.

<sup>b</sup> Texas Materials Institute and Department of Mechanical Engineering, The University of Texas at Austin, Austin, Texas, 78712, United States.

\* Corresponding authors.

E-mail addresses: [qrou@fudan.edu.cn](mailto:qrou@fudan.edu.cn) (Q. Ou), [zhangshuyu@fudan.edu.cn](mailto:zhangshuyu@fudan.edu.cn) (S. Zhang).

## Material Characterizations

The morphologies of the samples were conducted by scanning electron microscope (SEM, thermo scientific Apreo 2C) and transmission electron microscopy (TEM, FEI Talos F200S). X-ray diffraction (XRD) patterns were recorded on a Rigaku Ultima IV X-ray diffractometer using Cu-K $\alpha$  source, with a scan step of 2° min<sup>-1</sup>. X-ray photoelectron spectroscopy (XPS) analyses were recorded on a ThermoFischer ESCALAB Xi+ XPS instrument at a pressure of 8×10<sup>-10</sup> Pa using Al K $\alpha$  X-ray, carbon calibration at 284.8 eV. The consumption of Pt in the electrolyte after deposition was measured using a plasma mass spectrometer (ICP-OES, PE Avio 200) to obtain the loading of Pt.

## Electrochemical Characterizations

The electrochemical tests were performed on an electrochemical workstation (CHI 760E, Shanghai Chenhua, China), using a three-electrode system. The prepared samples were used as working electrodes directly, while saturated Hg/HgO electrode and high-purity graphite rod were used as reference electrode and counter electrode, respectively. The measured potential against the reference electrode was converted to a reversible hydrogen electrode (RHE) by the following formula  $E(\text{RHE})=E(\text{Hg}/\text{HgO})+0.098+0.059\times\text{pH}$ . The linear sweep voltammetry (LSV) polarization curves were recorded in the range of 0.1 to -1 V (vs. RHE) with a scan rate of 5 mV s<sup>-1</sup>. The polarization curves were calibrated with 90% iR compensation. The electrochemically active surface area (ECSA) of samples was obtained by measuring the cyclic voltammetry (CV) curves from 0.1~0.2 V (vs. RHE) with different scan rates (10~50 mV s<sup>-1</sup>). ECSA can be calculated by equation  $\text{ECSA}=C_{\text{dl}}/C_s$ , where  $C_s$  is the specific capacitance of the sample which is usually 0.040 mF cm<sup>-2</sup> in the alkaline solution. Electrochemical impedance spectroscopy (EIS) was performed in the

frequency range from  $10^5$  to 0.01 Hz with an amplitude of 5 mV at an overpotential of 100 mV. The long-term stability was determined by testing the chronopotentiometry (v-t) curve at a current density of  $500 \text{ mA cm}^{-2}$ .

## Theoretical calculations

All calculations were performed using CP2K<sup>1</sup>. The Gaussian Plane Waves (GPW) method in the QUICKSTEP module was utilized with the double-zeta valence polarized DZVP-MOLOPT-SR-GTH basis set<sup>2</sup> and the norm-conserving GTH-PBE pseudopotential.<sup>3</sup> Three-dimensional periodic boundary conditions were applied, incorporating approximately a 20 Å vacuum layer in the Z direction. A cut-off energy of 500 Ry was used for the planewave expansion, and each Gaussian was mapped onto a 60 Ry cut-off grid. Dispersion was accounted for using D3(BJ)<sup>4,5</sup> in all calculations. The electron distribution was characterized using the Fermi-Dirac function at an electronic temperature of 300 K. The convergence threshold for the density matrix during the self-consistent field process was set at  $10^{-7}$  Ry. The default setting was used as the convergence limit for geometric optimization.

In the thermodynamic calculation, Gibbs free energy change is determined by enthalpy change, zero-point energy correction (ZPE) and entropy of the system, as shown in the following formula:

$$\Delta G_{\text{H}^*} = \Delta E_{\text{H}^*} + \Delta_{\text{ZPE}} - T\Delta S$$

Where  $\Delta E_{\text{H}^*}$  is the chemisorption energy of hydrogen atom, is equivalent to the thermal correction of the internal energy at 0 K which measures the difference between the adsorbed state and the gas phase. The third term is related to the entropy of the system and can be calculated from the partition function. Considering the simplicity of practical calculation, some approximations can be used to get the result:<sup>6</sup>

$$\Delta G_{\text{H}^*} = \Delta E_{\text{H}^*} + 0.24(\text{eV})$$

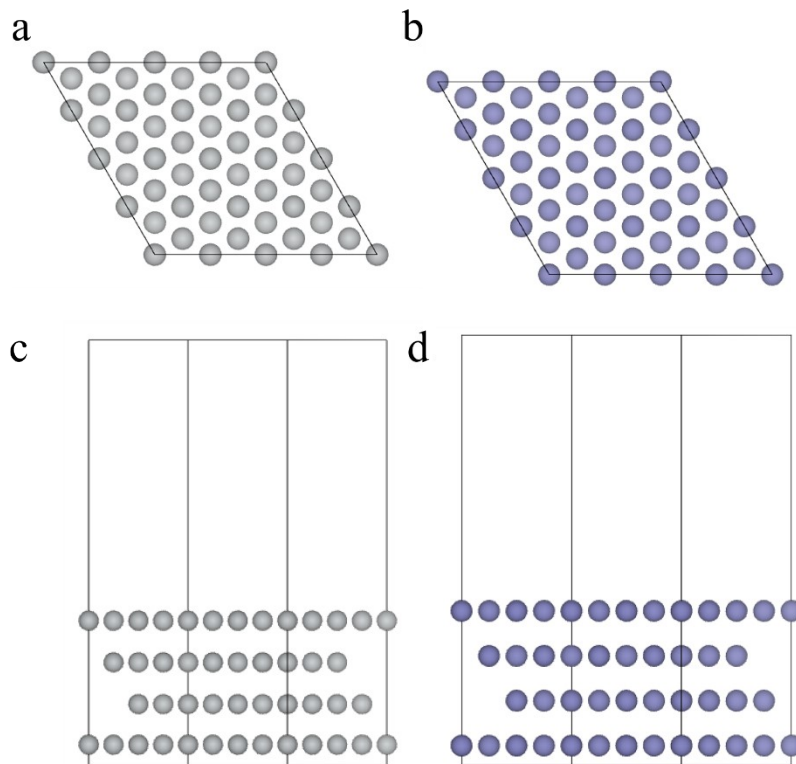

**Fig. S1.** Top and side view of the atomic structure models of (a, c) Ni (111) and (b, d) Pt (111).

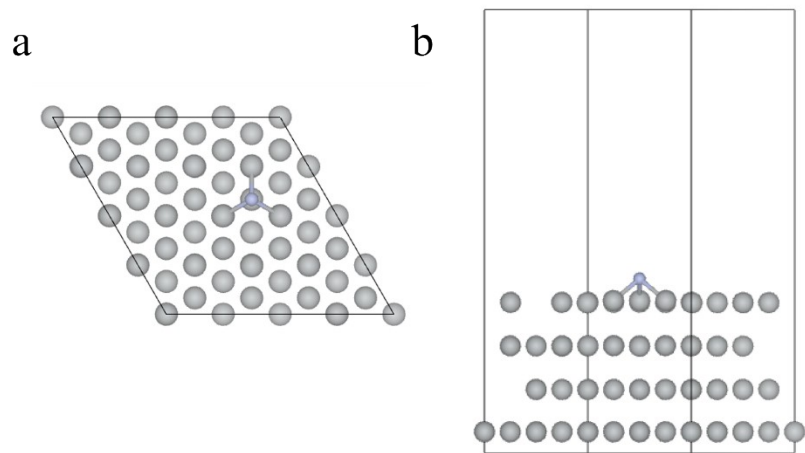

**Fig. S2.** (a) Top and (b) side view of the atomic structure models of N-Ni.

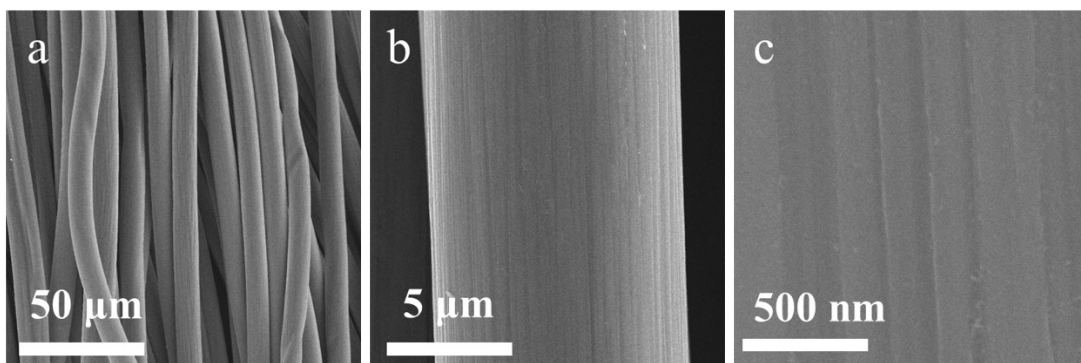

**Fig. S3.** SEM images of CC

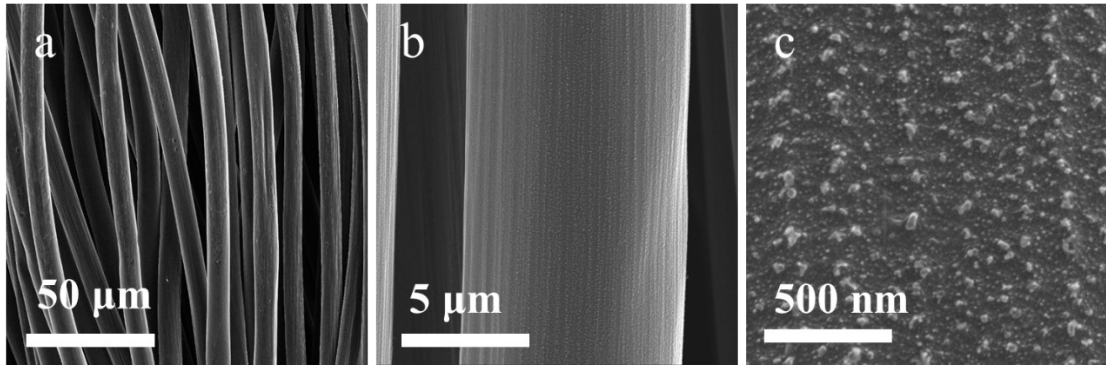

**Fig. S4.** SEM images of NC.

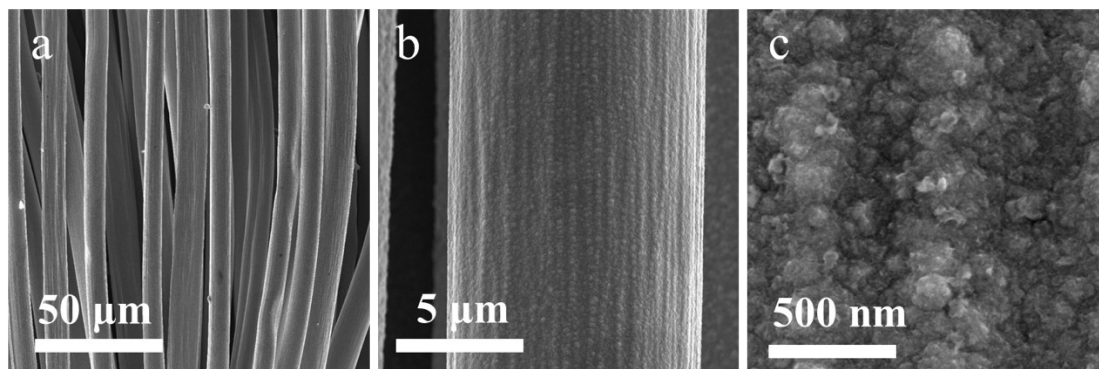

**Fig. S5.** SEM images of Ni/NC.



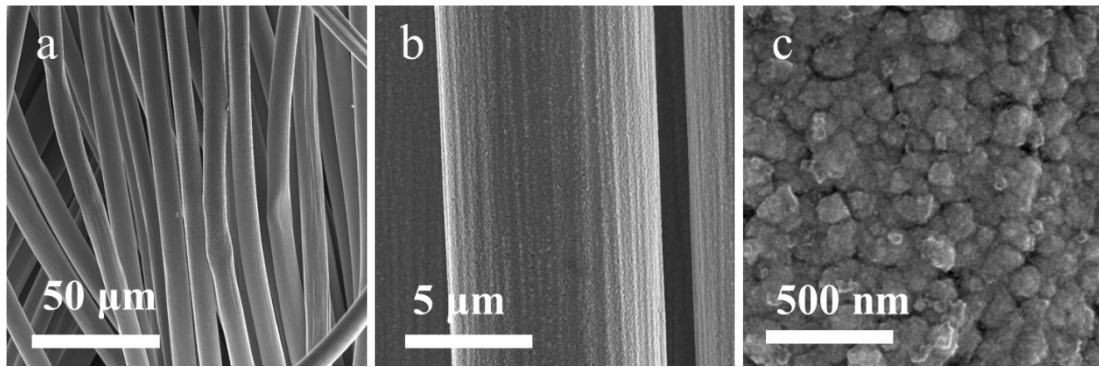

**Fig. S6.** SEM images of N-Ni/NC.

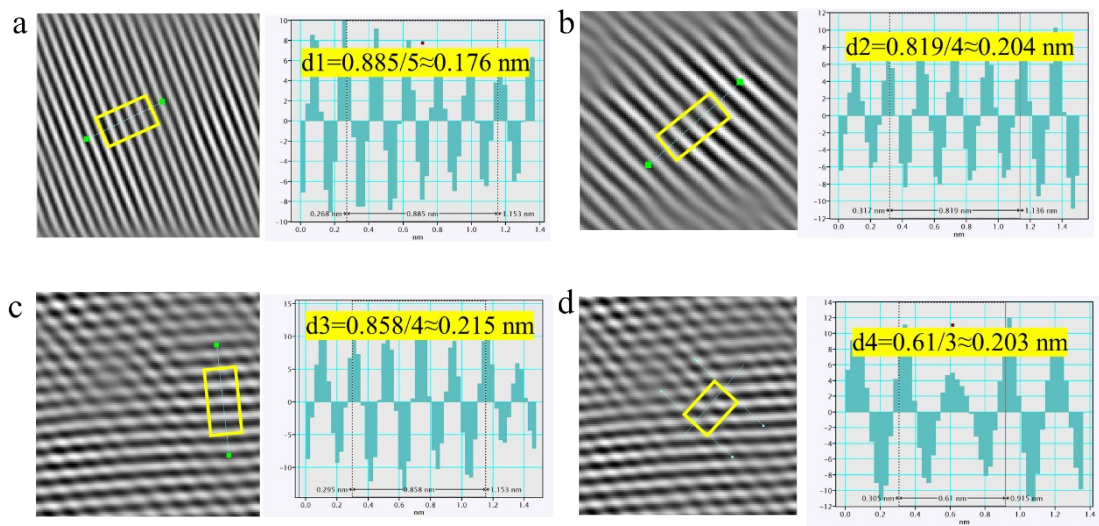

**Fig. S7.** Interplanar spacing measurement of  $d_1 \sim d_4$  in Fig. 2b.

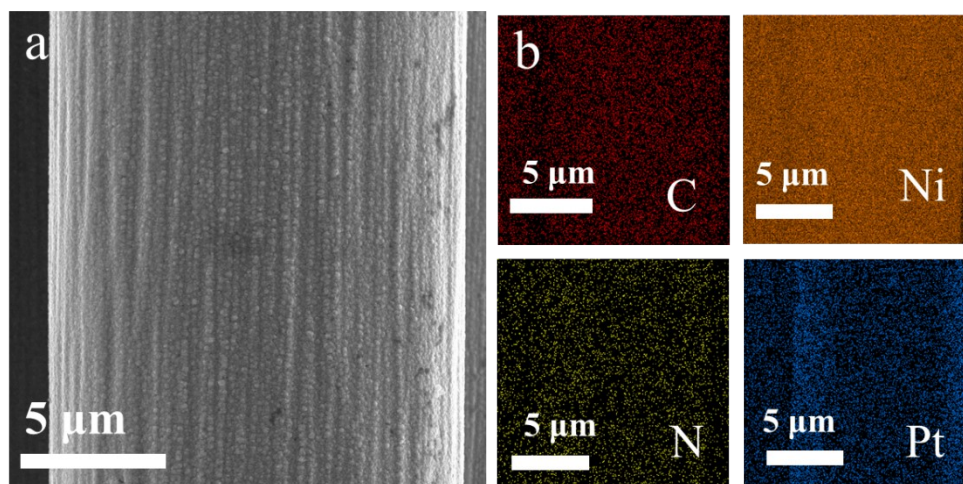

**Fig. S8.** (a) SEM image and (b) EDS element mapping of Pt-N-Ni/NC.

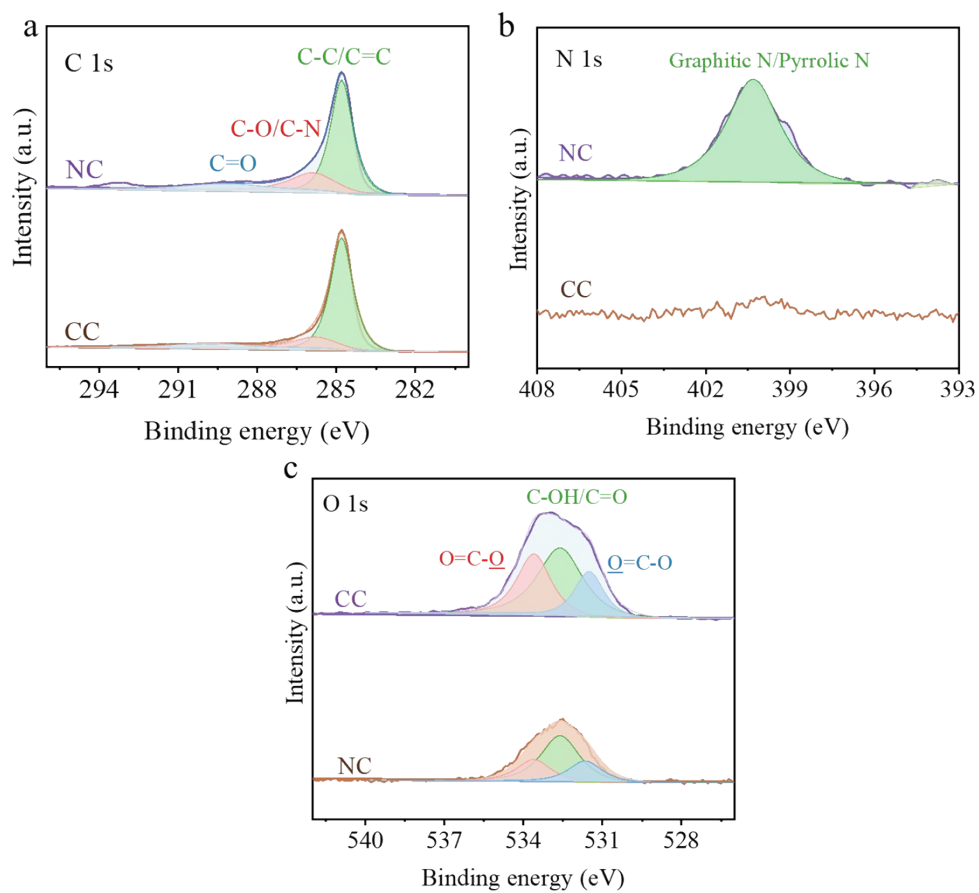

**Fig. S9.** (a) C 1s, (b) N 1s and (c) O 1s high resolution XPS spectrums of CC and NC.

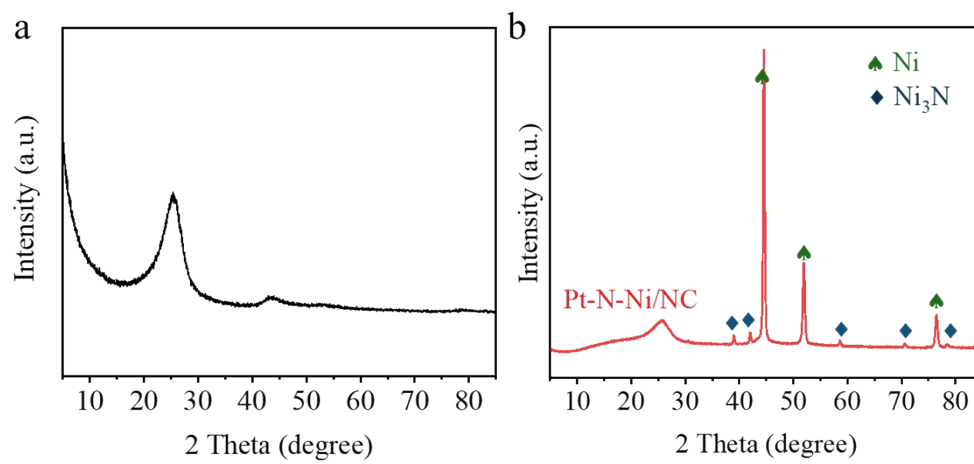

**Fig. S10.** XRD patterns of (a) CC and (b) Pt-N-Ni/NC.

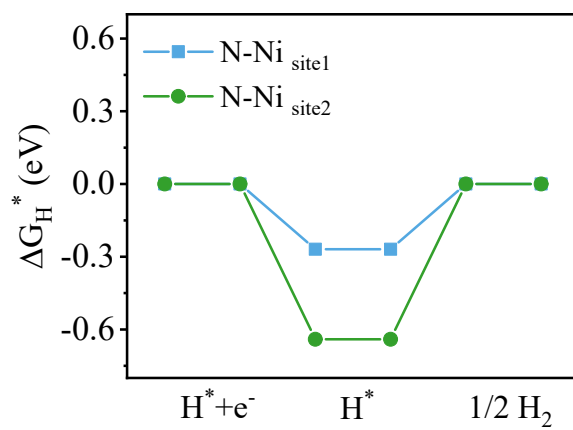

**Fig. S11.**  $\Delta G_{H^*}$  on the surface of N-Ni.

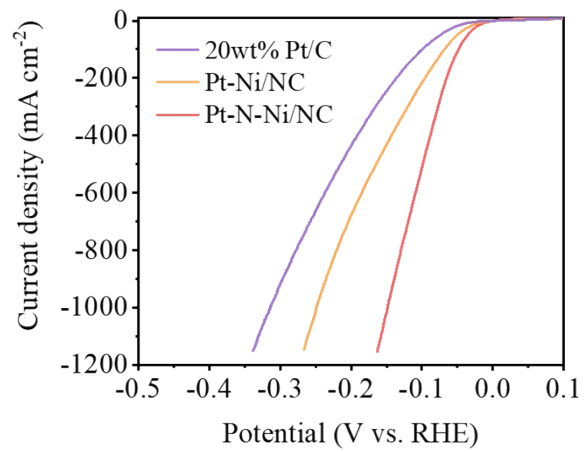

**Fig. S12.** Polarization curves of 20 wt% Pt/C, Pt-Ni/NC and Pt-N-Ni/NC.

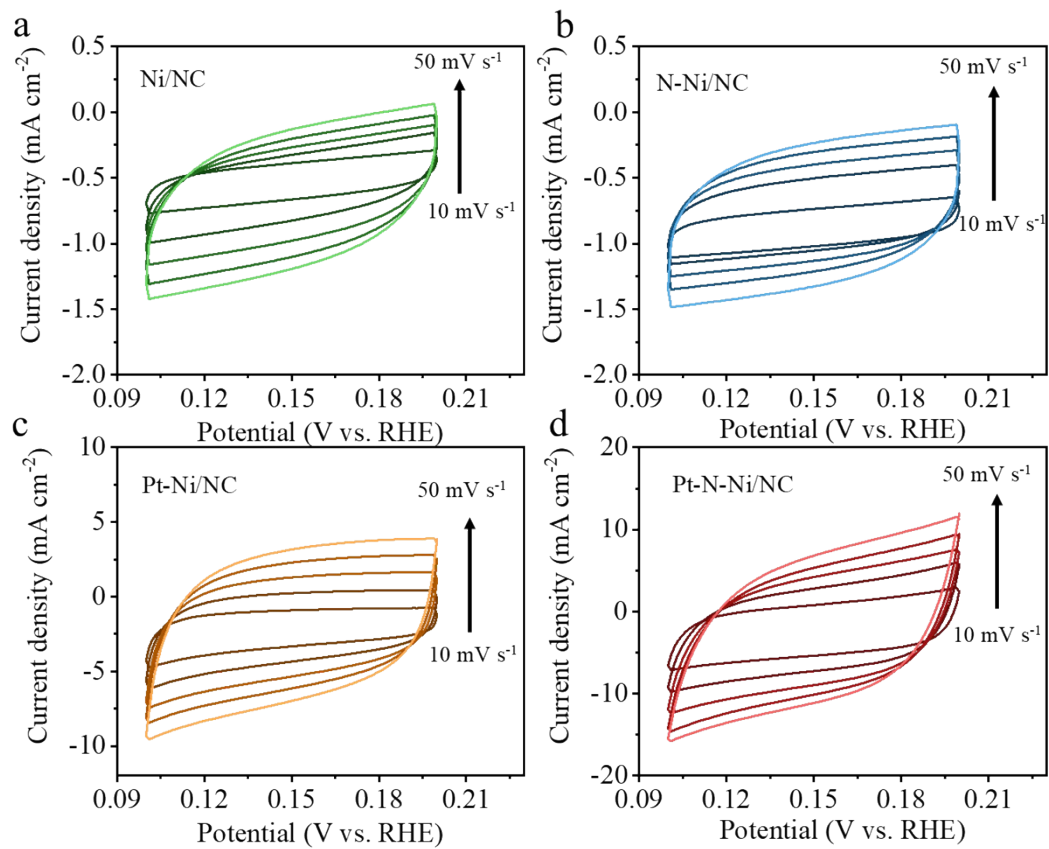

**Fig. S13.** CV measurement of (a) Ni/NC, (b) N-Ni/NC, (c) Pt-Ni/NC and (d) Pt-N-Ni/NC with scan rates of 10~50 mV s<sup>-1</sup>.



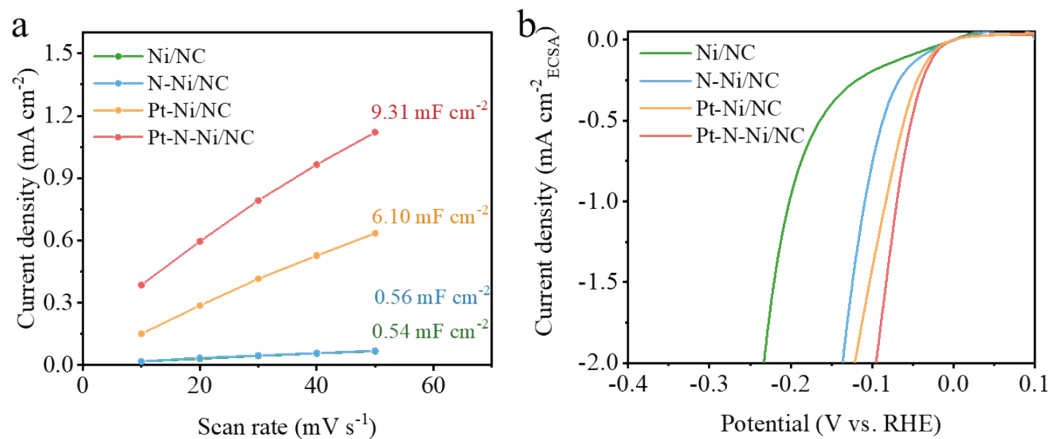

**Fig. S14.** Capacitive current as a function of scan rate (half of the slope is  $C_{dl}$ ). (b)

Polarization curves from Fig. 3a normalized to the ECSA.

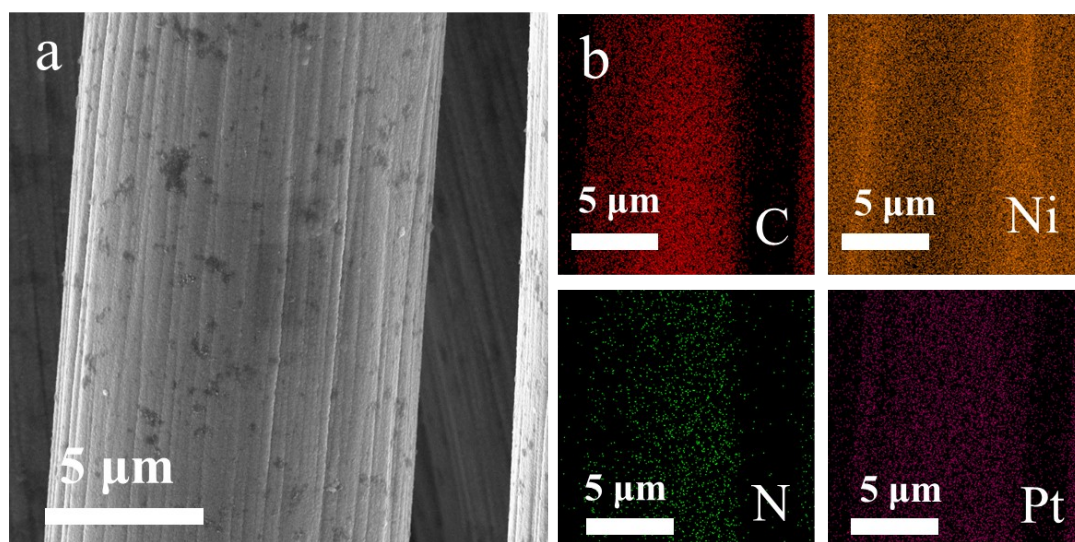

**Fig. S15.** (a) SEM image and (b) EDS element mapping of Pt-N-Ni/NC after long-term stability testing.

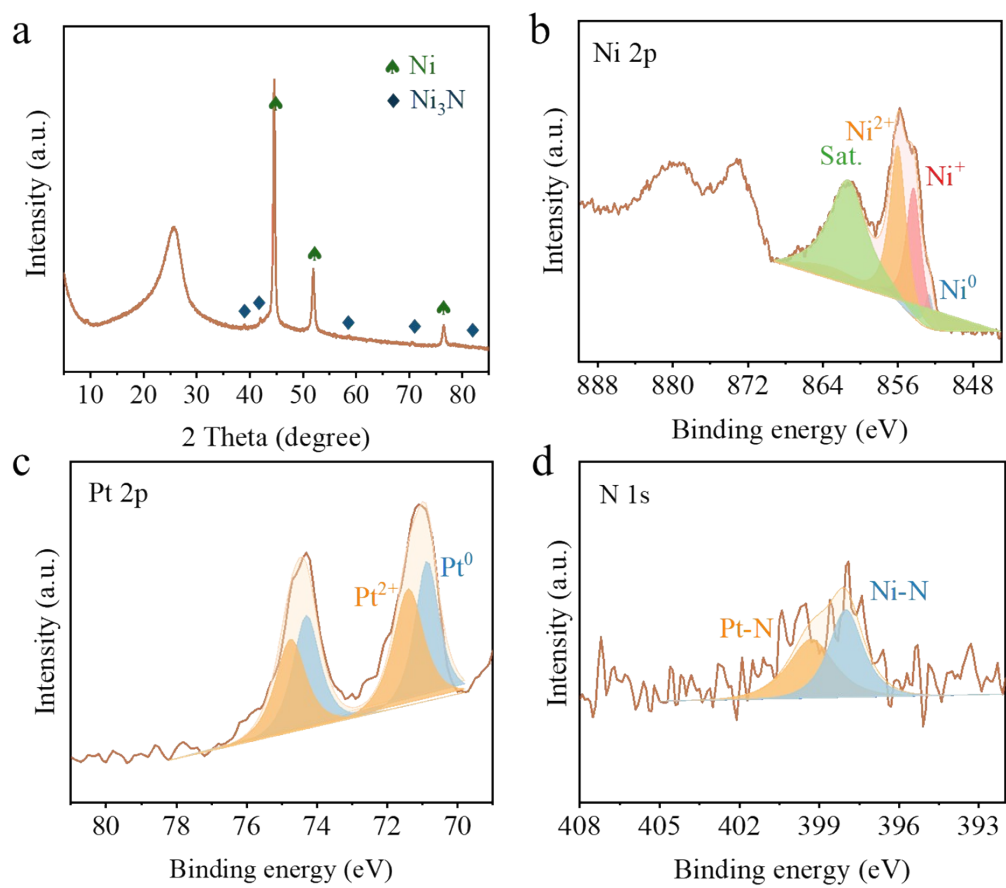

**Fig. S16.** (a) XRD pattern, (b) Ni 2p, (c) Pt 2p and (d) N 1s high resolution XPS spectrum of Pt-N-Ni/NC after long-term test.

**Table S1.** Parameters of commercial solar cell.

| Active material | Pm(W) | Isc(A) | Voc(V) | Ipm(A) | Vpm(V) | FF   |
|-----------------|-------|--------|--------|--------|--------|------|
| Si              | 22.75 | 7.59   | 3.98   | 7.14   | 3.19   | 0.75 |

Pm: maximum power, Isc: short-circuit current, Voc: open-circuit voltage, Ipm: current at maximum power point, Vpm: voltage at maximum power point, FF: filling factor.

**Table S2.** The HER catalytic activity compared with other reported literatures.

| Catalyst                                                  | Current density<br>(mA cm <sup>-2</sup> ) | Overpotential<br>(mV) | Tafel slop<br>(mV dec <sup>-1</sup> ) | Ref.      |
|-----------------------------------------------------------|-------------------------------------------|-----------------------|---------------------------------------|-----------|
| Pt-N-Ni/NC                                                | 10                                        | 15                    | 44.9                                  | This work |
|                                                           | 1000                                      | 149                   |                                       |           |
| Pt/GaN                                                    | 10                                        | 24                    | 48.9                                  | 7         |
|                                                           | 1000                                      | 441                   |                                       |           |
| Pt/TiO <sub>2</sub> /Ni(OH) <sub>2</sub>                  | 10                                        | 26                    | 38.9                                  | 8         |
|                                                           | 1000                                      | 145                   |                                       |           |
| Pt/D-NiFe LDH                                             | 10                                        | 28                    | 43                                    | 9         |
|                                                           | 1000                                      | 217                   |                                       |           |
| Ru-CoO <sub>x</sub> /NF                                   | 10                                        | 20                    | 28                                    | 10        |
|                                                           | 1000                                      | 252                   |                                       |           |
| Pt/8-NCNT                                                 | 10                                        | 17                    | 33.3                                  | 11        |
|                                                           | 1000                                      | 153                   |                                       |           |
| np/Pt <sub>1</sub> Ru <sub>1</sub> -Ni <sub>0.85</sub> Se | 10                                        | 46                    | 32.4                                  | 12        |
|                                                           | 1000                                      | 225                   |                                       |           |
| Pt <sub>2</sub> /Ni(OH) <sub>2</sub> /NF                  | 10                                        | 19                    | 70                                    | 13        |
|                                                           | 1000                                      | 274                   |                                       |           |
| NA-Ru <sub>3</sub> Ni/C                                   | 10                                        | 14                    | 28                                    | 14        |
|                                                           | 1000                                      | 168                   |                                       |           |
| Pt-NiMo-OH/NF                                             | 10                                        | 34                    | 30.5                                  | 15        |
|                                                           | 1000                                      | 221                   |                                       |           |
| Fe-PtNiPO                                                 | 10                                        | 19                    | 35                                    | 16        |
|                                                           | 1000                                      | 193                   |                                       |           |
| Ru-Ni(OH) <sub>2</sub>                                    | 10                                        | 15                    | 37                                    | 17        |
|                                                           | 1000                                      | 267                   |                                       |           |

**Table S3.** Comparison of catalyst performance in AEM electrolyzers with other literatures.

| Cathode                             | Anode                                            | Anion exchange membrane    | Current density (A cm <sup>-2</sup> ) | Voltage (V)  | Ref.      |
|-------------------------------------|--------------------------------------------------|----------------------------|---------------------------------------|--------------|-----------|
| Pt-N-Ni/NC                          | NiFeOOH                                          | PiperION A-40              | 0.5<br>1                              | 1.63<br>1.75 | This work |
| Raney nickel                        | NiFe <sub>2</sub> O <sub>4</sub>                 | Sustainion X37-50 Grade T  | 1                                     | 1.83         | 18        |
| NiMoN/NF                            | (Fe,Ni)OOH/NF                                    | Sustainion X37-50 Grade RT | 0.5                                   | 1.795        | 19        |
| Ni <sub>3</sub> N/Ni/Ti mesh        | NiFe <sub>2</sub> O <sub>4</sub> /SS fiber       | Fumapem FAA-3-50           | 0.5                                   | 1.88         | 20        |
| Pt/C                                | Ni <sub>2</sub> P/Ni <sub>7</sub> S <sub>6</sub> | Fumasep FAA-3-50           | 1                                     | 1.88         | 21        |
| r-Ru-Ni/NiO                         | NiFe LDH                                         | Fumasep FAA-3-50           | 1                                     | 2.03         | 22        |
| 20% Pt/C                            | Mo-CoOOH/NF                                      | HoAM Grion 1204            | 1                                     | 2.02         | 23        |
| Pt@-NiFe LDH                        | S-NiFe LDH                                       | Fumasep FAA-3-PK-130       | 0.5                                   | 2.5          | 24        |
| NiFeCo phosphide                    | NiFeCo LDH                                       | Sustainion X37-50 Grade RT | 0.5                                   | 1.72         | 25        |
| Co <sub>2</sub> P-                  | Fe <sub>2</sub> P-                               | Fumasep                    | 1                                     | 1.95         | 26        |
| Ni <sub>12</sub> P <sub>5</sub> /NF | Ni <sub>12</sub> P <sub>5</sub> /NF              | FAA-3-50                   | 1                                     | 1.88         | 27        |
| Pt mesh                             | Ni <sub>2</sub> P/FeP <sub>2</sub> /MN           | FAA-3-50                   | 1                                     | 1.88         | 27        |
| Pt-AC/Cr-N-C                        | NiFe LDH                                         | Sustainion X37-50          | 0.5<br>1                              | 1.78<br>1.9  | 28        |

**Table S4.** Comparison of solar-driven water splitting with other literatures.

| Cathode                                 | Anode                                   | Current density<br>(mA cm <sup>-2</sup> ) | STH<br>(%) | Ref.      |
|-----------------------------------------|-----------------------------------------|-------------------------------------------|------------|-----------|
| Pt-N-Ni/NC                              | FeNiOOH                                 | 1390                                      | 8.33       | This work |
| Pt/C                                    | NiFeCo-OOH                              | 571                                       | 12.44      | 29        |
| nickel nanomesh                         | nickel nanomesh                         | ≈60                                       | 9.98       | 30        |
| Pt/C/CPF                                | Ni-TFBDC/CFP                            | 206.7                                     | 10.17      | 31        |
| Co-OSP                                  | Co-OSP                                  | ≈8                                        | 9.80       | 32        |
| NiMoP/NF                                | NiFeP/NF                                | 11.6                                      | 14.30      | 33        |
| Ce-NiMo-PS@NF                           | Ce-NiMo-PS@NF                           | 16.5                                      | 18.69      | 34        |
| PCO-nHI                                 | PCO-nHI                                 | 9.9                                       | 11.50      | 35        |
| CoP/CTF                                 | CoP/CTF                                 | 10.5                                      | 16.80      | 36        |
| Co <sub>2</sub> P-MoNiP/NF              | NiFe-LDH/NF                             | 16                                        | 19.68      | 37        |
| CoP@Ni <sub>2</sub> P-Fe <sub>2</sub> P | CoP@Ni <sub>2</sub> P-Fe <sub>2</sub> P | 12.46                                     | 15.33      | 38        |
| S-FeNiOOH                               | S-FeNiOOH                               | 6                                         | 7.20       | 39        |
| Pt-Ti                                   | a-NiFeOOH/N-CFP                         | 161                                       | 8.14       | 40        |

## References

1. T. D. Kühne, M. Iannuzzi, M. Del Ben, V. V. Rybkin, P. Seewald, F. Stein, T. Laino, R. Z. Khaliullin, O. Schütt and F. Schiffmann, *J. Chem. Phys.*, 2020, **152**.
2. J. VandeVondele and J. Hutter, *J. Chem. Phys.*, 2007, **127**.
3. M. Krack, *Theor. Chem. Acc.*, 2005, **114**, 145-152.
4. S. Grimme, J. Antony, S. Ehrlich and H. Krieg, *J. Chem. Phys.*, 2010, **132**.
5. S. Grimme, S. Ehrlich and L. Goerigk, *J. Comput. Chem.*, 2011, **32**, 1456-1465.
6. J. K. Nørskov, T. Bligaard, A. Logadottir, J. Kitchin, J. G. Chen, S. Pandelov and U. Stimming, *J. Electrochem. Soc.*, 2005, **152**, J23.
7. C. Liu, C. Niu, B. Gao, P. Jiang, Q. Lin, W. Wu, Y. Jia, Z. Wei and Q. Xu, *ChemNanoMat*, 2023, **9**, e202300195.
8. A. Kong, M. Peng, M. Liu, Y. Lv, H. Zhang, Y. Gao, J. Liu, Y. Fu, W. Li and J. Zhang, *Appl. Catal. B*, 2022, **316**, 121654.
9. Z. Wu, Z. Chen, K. Xu, B. Li, Z. Li, G. Xu, W. Xiao, T. Ma, Y. Fu and L. Wang, *Renewable Energy*, 2023, **210**, 196-202.
10. D. Wu, D. Chen, J. Zhu and S. Mu, *Small*, 2021, **17**, 2102777.
11. W. Yu, H. Huang, Y. Qin, D. Zhang, Y. Zhang, K. Liu, Y. Zhang, J. Lai and L. Wang, *Adv. Energy Mater.*, 2022, **12**, 2200110.
12. L. Cai, H. Bai, C.-w. Kao, K. Jiang, H. Pan, Y.-R. Lu and Y. Tan, *Small*, 2024, **n/a**, 2311178.
13. J. Sun, Z. Zhang and X. Meng, *Appl. Catal. B*, 2023, **331**, 122703.
14. L. Gao, F. Bao, X. Tan, M. Li, Z. Shen, X. Chen, Z. Tang, W. Lai, Y. Lu, P. Huang, C. Ma, S. C. Smith, Z. Ye, Z. Hu and H. Huang, *Energy Environ. Sci.*, 2023, **16**, 285-294.



15. X. Zhang, Y. Han, W. Cai, D. Zhang, Z. Wang, H. Li, Y. Sun, Y. Zhang, J. Lai and L. Wang, *Adv. Mater. Interfaces*, 2022, **9**, 2102154.
16. K. Feng, J. Xu, Y. Chen, S. Li, Z. Kang and J. Zhong, *Adv. Sci.*, 2022, **9**, 2203199.
17. Y. Zhang, Z. Li, L. Hou and X. Liu, *Adv. Funct. Mater.*, 2023, **33**, 2213976.
18. B. Motealleh, Z. Liu, R. I. Masel, J. P. Sculley, Z. Richard Ni and L. Meroueh, *Int. J. Hydrogen Energy*, 2021, **46**, 3379-3386.
19. L. Wu, M. Ning, X. Xing, Y. Wang, F. Zhang, G. Gao, S. Song, D. Wang, C. Yuan, L. Yu, J. Bao, S. Chen and Z. Ren, *Adv. Mater.*, 2023, **35**, 2306097.
20. D. Zhang, H. Li, A. Riaz, A. Sharma, W. Liang, Y. Wang, H. Chen, K. Vora, D. Yan, Z. Su, A. Tricoli, C. Zhao, F. J. Beck, K. Reuter, K. Catchpole and S. Karuturi, *Energy Environ. Sci.*, 2022, **15**, 185-195.
21. F.-L. Wang, N. Xu, C.-J. Yu, J.-Y. Xie, B. Dong, X.-Y. Zhang, Y.-W. Dong, Y.-L. Zhou and Y.-M. Chai, *Appl. Catal. B*, 2023, **330**, 122633.
22. N. Xu, J.-Y. Lv, H.-Y. Sun, X.-J. Tian, W.-L. Yu, X. Li, C.-Y. Liu, Y.-M. Chai and B. Dong, *J. Colloid Interface Sci.*, 2024, **664**, 704-715.
23. L. Tang, L. Yu, C. Ma, Y. Song, Y. Tu, Y. Zhang, X. Bo and D. Deng, *J. Mater. Chem. A*, 2022, **10**, 6242-6250.
24. H. Lei, Q. Wan, S. Tan, Z. Wang and W. Mai, *Adv. Mater.*, 2023, **35**, 2208209.
25. J. Lee, H. Jung, Y. S. Park, N. Kwon, S. Woo, N. C. S. Selvam, G. S. Han, H. S. Jung, P. J. Yoo, S. M. Choi, J. W. Han and B. Lim, *Appl. Catal. B*, 2021, **294**, 120246.
26. L. Guo, X. Liu, Z. He, Z. Chen, Z. Zhang, L. Pan, Z.-F. Huang, X. Zhang, Y. Fang and J.-J. Zou, *ACS Sustain. Chem. Eng.*, 2022, **10**, 9956-9968.
27. J. Xie, F. Wang, Y. Zhou, Y. Dong, Y. Chai and B. Dong, *Nanomicro Lett*, 2023,

- 16, 39.
28. A. Kong, M. Peng, M. Liu, Y. Lv, H. Zhang, Y. Gao, J. Liu, Y. Fu, W. Li and J. Zhang, *Appl. Catal. B*, 2022, **316**, 121654.
  29. J. S. Ha, Y. Park, J.-Y. Jeong, S. H. Lee, S. J. Lee, I. T. Kim, S. H. Park, H. Jin, S. M. Kim, S. Choi, C. Kim, S. M. Choi, B. K. Kang, H. M. Lee and Y. S. Park, *Adv. Sci.*, 2024, **n/a**, 2401782.
  30. N. Plankensteiner, A. Agosti, J. Govaerts, R. Rupp, S. Singh, J. Poortmans, P. M. Vereecken and J. John, *Solar RRL*, 2023, **7**, 2201095.
  31. X. Li, X. Wu, B. Li, S. Zhang, Y. Liu, Z. Li, D. Zhang, X. Wang, Q. Sun, D. Gao, C. Zhang, W.-H. Huang, C.-C. Chueh, C.-L. Chen, S. Yang, S. Xiao, Z. Wang and Z. Zhu, *ACS Nano*, 2023, **17**, 23478-23487.
  32. B. Chong, M. Xia, Y. Lv, H. Li, X. Yan, B. Lin and G. Yang, *Chem. Eng. J.*, 2023, **465**, 142853.
  33. H. Roh, H. Jung, H. Choi, J. W. Han, T. Park, S. Kim and K. Yong, *Appl. Catal. B*, 2021, **297**, 120434.
  34. Y. Cheng, A. Yuan, Y. Zhang, H. Liu, J. Du and L. Chen, *J. Colloid Interface Sci.*, 2024, **660**, 166-176.
  35. G. Y. Jang, S. Kim, J. Choi, J. Park, S. An, J. Baek, Y. Li, T.-K. Liu, E. Kim, J. H. Lee, H. Wang, M. Kim, H.-S. Cho, X. Zheng, J. S. Yoo, K. Seo and J. H. Park, *Adv. Energy Mater.*, 2024, **14**, 2303924.
  36. S. Min, Z. Meng, Y. Zhao, W. Li, Z. Zhang and F. Wang, *Sustainable Energy & Fuels*, 2024, **8**, 310-321.
  37. Y. Zhao, H. Zhang, J. Chen, S. Zhao, M. Xi, L. Yang, Y. Long, Z. Ni, Y. Zhou and A. Chen, *Chem. Eng. J.*, 2023, **477**, 147092.
  38. K. Chang, D. T. Tran, J. Wang, K. Dong, S. Prabhakaran, D. H. Kim, N. H. Kim

- and J. H. Lee, *Appl. Catal. B*, 2023, **338**, 123016.
39. C. Kim, S. H. Kim, S. Lee, I. Kwon, S. H. Kim, S. Kim, C. Seok, Y. S. Park and Y. Kim, *J. Energy Chem.*, 2022, **64**, 364-371.
40. P. Thangavel, G. Kim and K. S. Kim, *J. Mater. Chem. A*, 2021, **9**, 14043-14051.
